# Supplementary material for: Improved antiproliferative activity of novel Pulsatilla saponin D/α-hederin derivatives containing nitric oxide donors
Source: Royal Society of Chemistry journal article supplement (doi:10.1039/d0nj02941f), 2020-01-01

## Improved antiproliferative activity of novel pulsatilla saponin D/ $\alpha$ -hederin derivatives containing nitric oxide donors

Zunhua Yang<sup>a</sup>, Huilan Li<sup>b</sup>, Zhifeng Li<sup>b</sup>, Yulin Feng<sup>b</sup>, Yi Jin<sup>b</sup>, Yanhua Liu<sup>a</sup>,  
Mingdong Li<sup>a</sup>, Ronghua Liu<sup>a</sup>, Yuanying Fang<sup>b,\*</sup>

<sup>a</sup> College of Pharmacy, Jiangxi University of Traditional Chinese Medicine, Nanchang 330004, China

<sup>b</sup> National Engineering Research Center for Manufacturing Technology of TCM Solid Preparation, Jiangxi University of Traditional Chinese Medicine, Nanchang 330006, China

### Supporting information

<sup>1</sup>H-NMR, <sup>13</sup>C-NMR of final compounds

---

\* Corresponding author.

E-mail address: fangyuanying@163.com (Y. Fang).

### <sup>1</sup>H-NMR of compound 4a

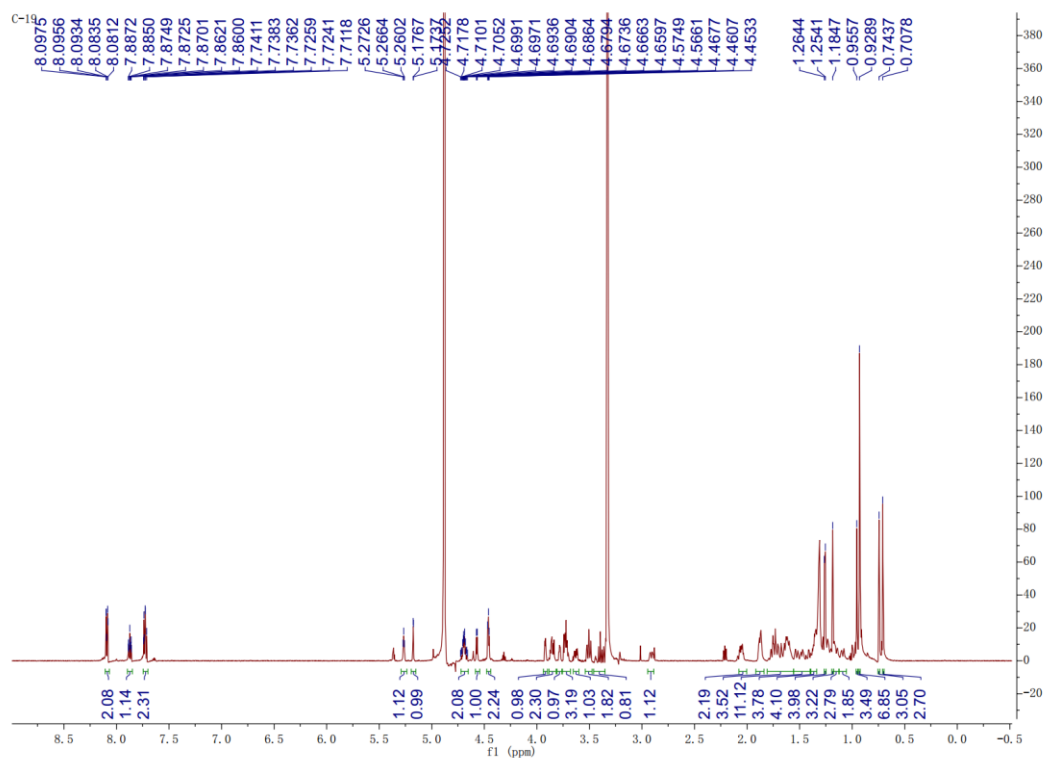

### <sup>1</sup>H-NMR of compound 5a

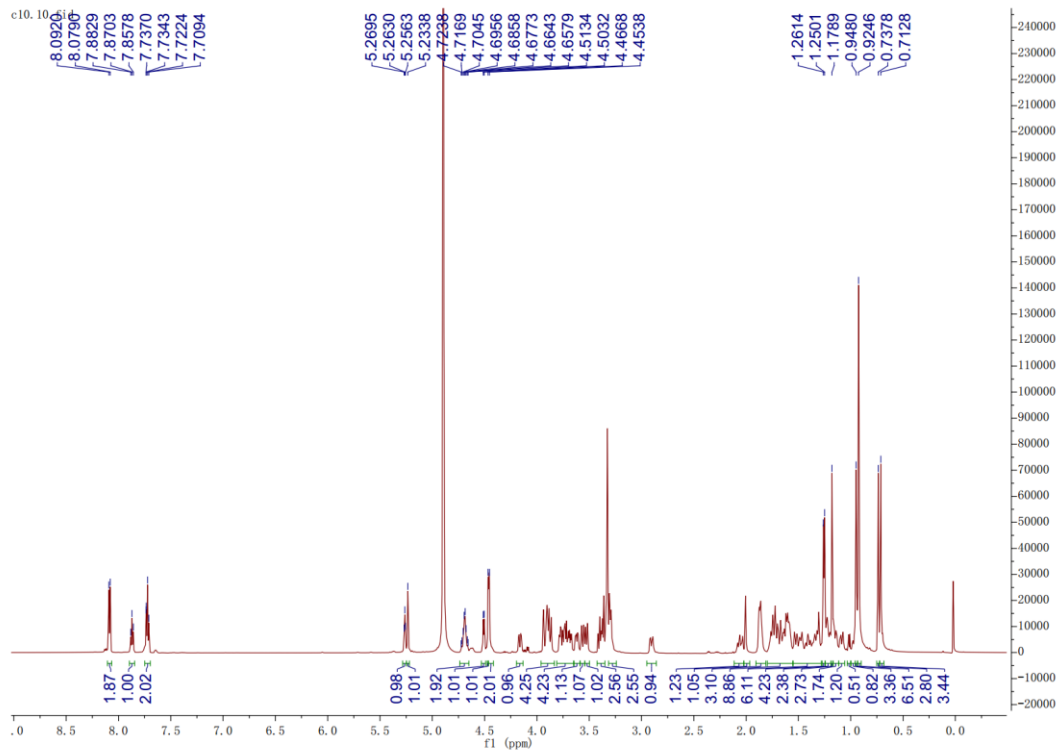

### $^{13}\text{C}$ -NMR of compound **5a**

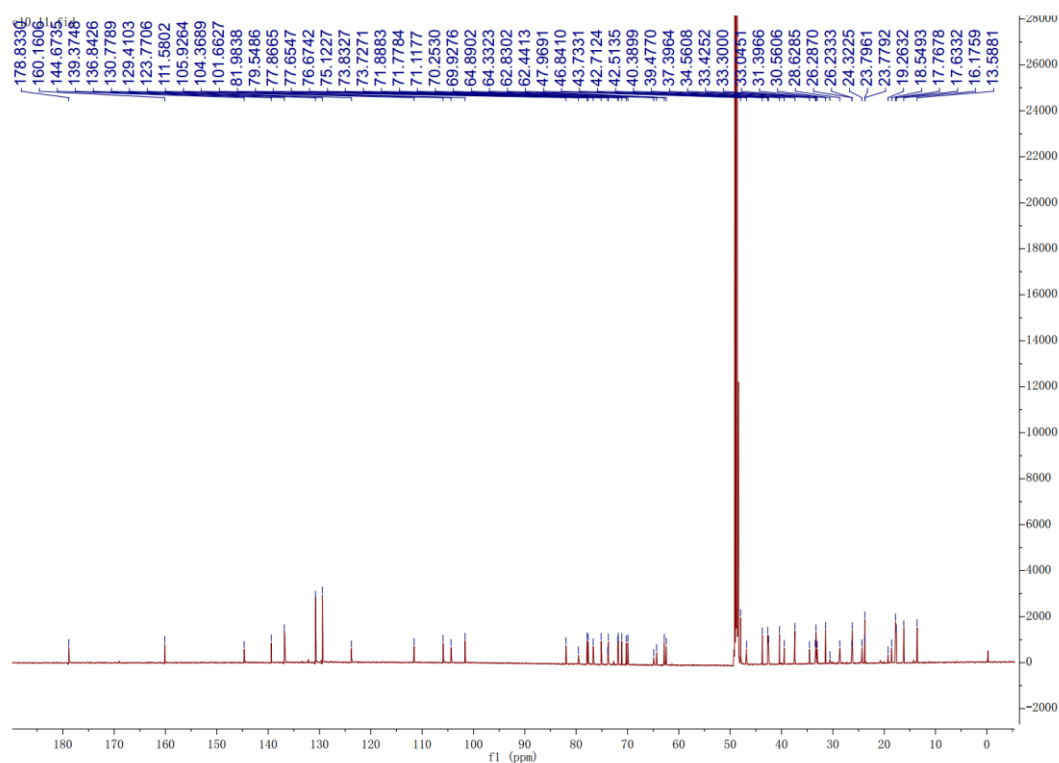

### $^1\text{H}$ -NMR of compound **4b**

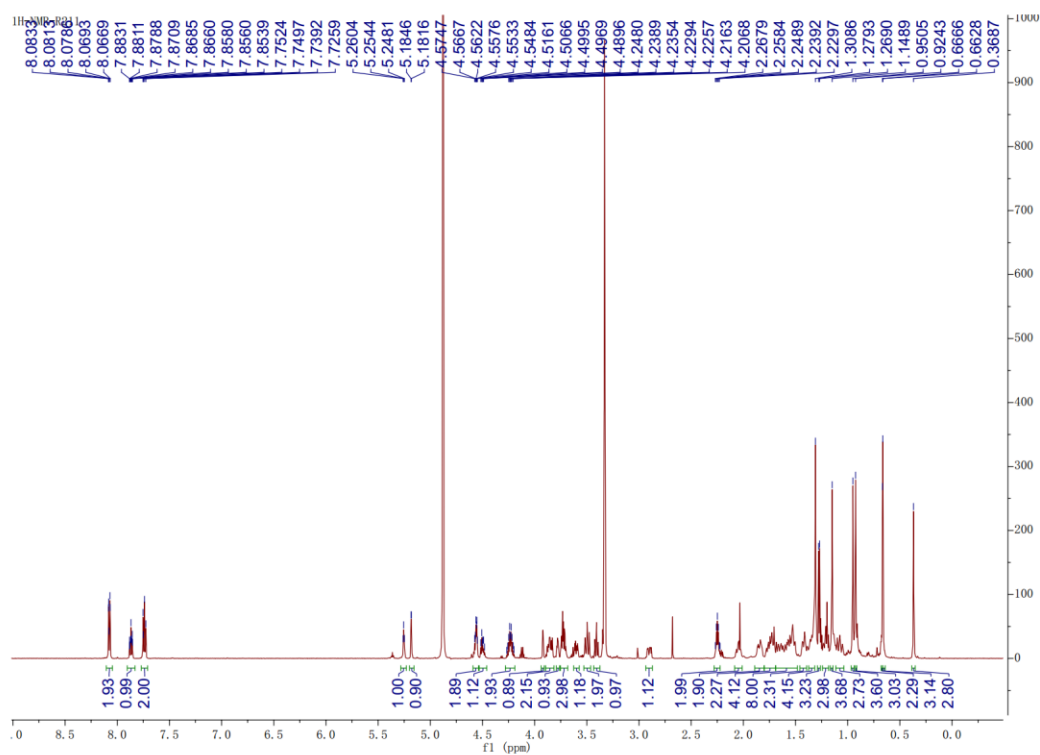

### <sup>13</sup>C-NMR of compound **4b**

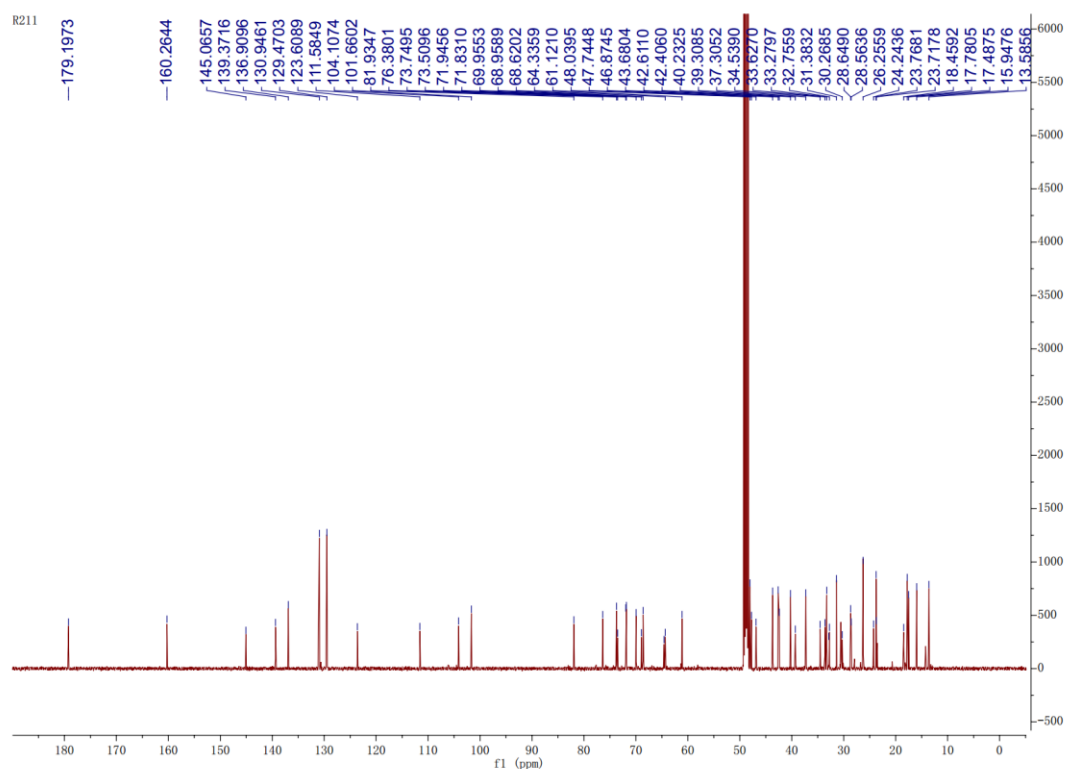

### <sup>1</sup>H-NMR of compound **5b**

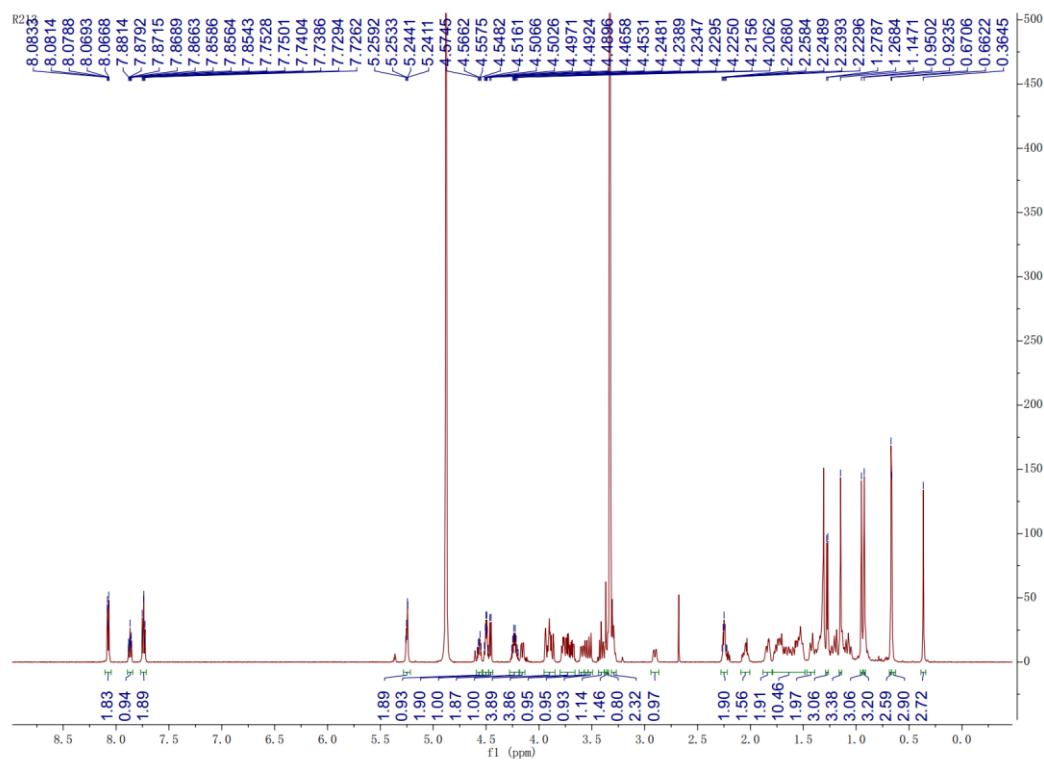

### $^{13}\text{C}$ -NMR of compound **5b**

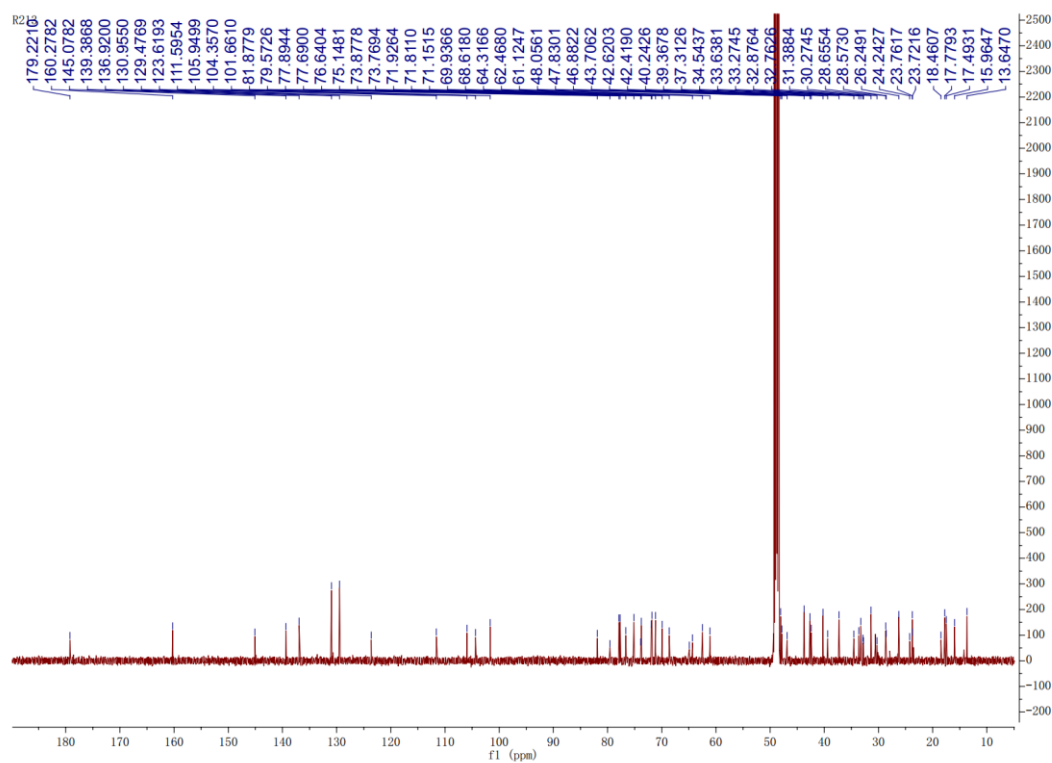

### $^1\text{H}$ -NMR of compound **4c**

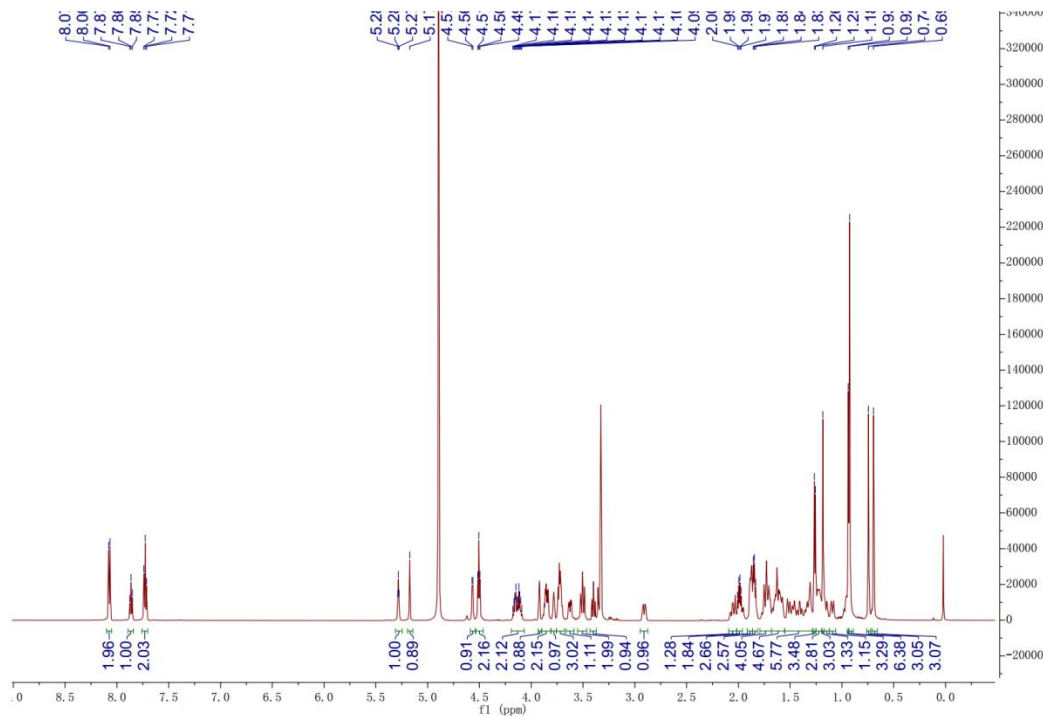

### $^{13}\text{C}$ -NMR of compound 4c

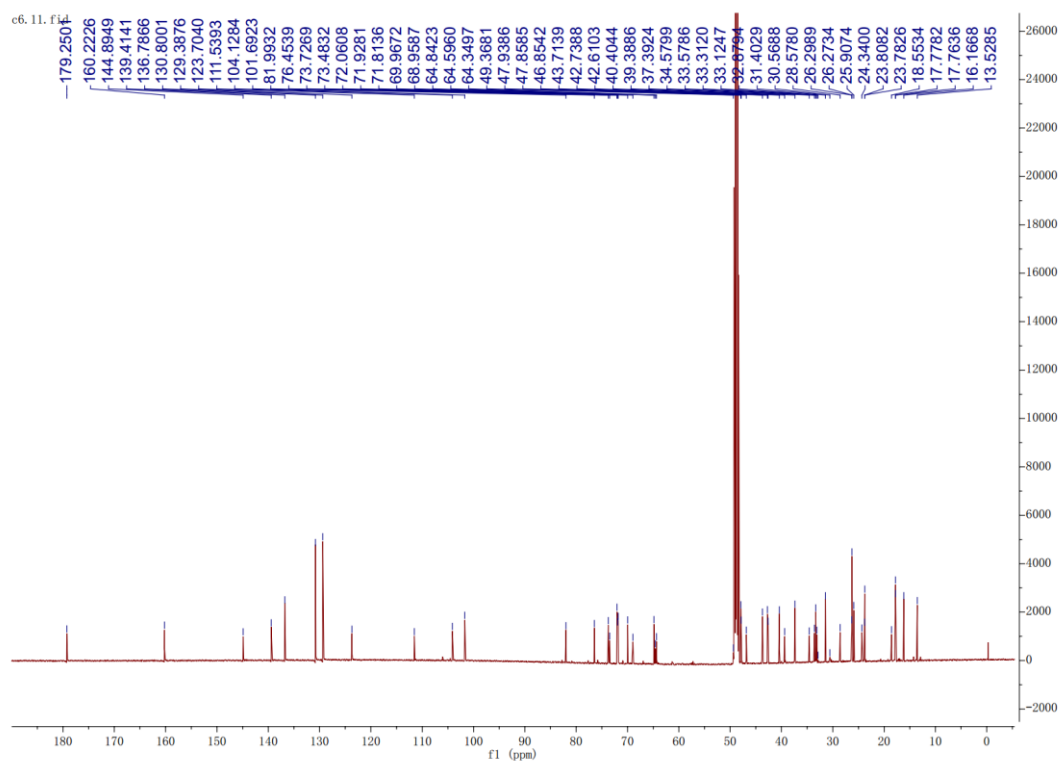

### $^1\text{H}$ -NMR of compound 5c

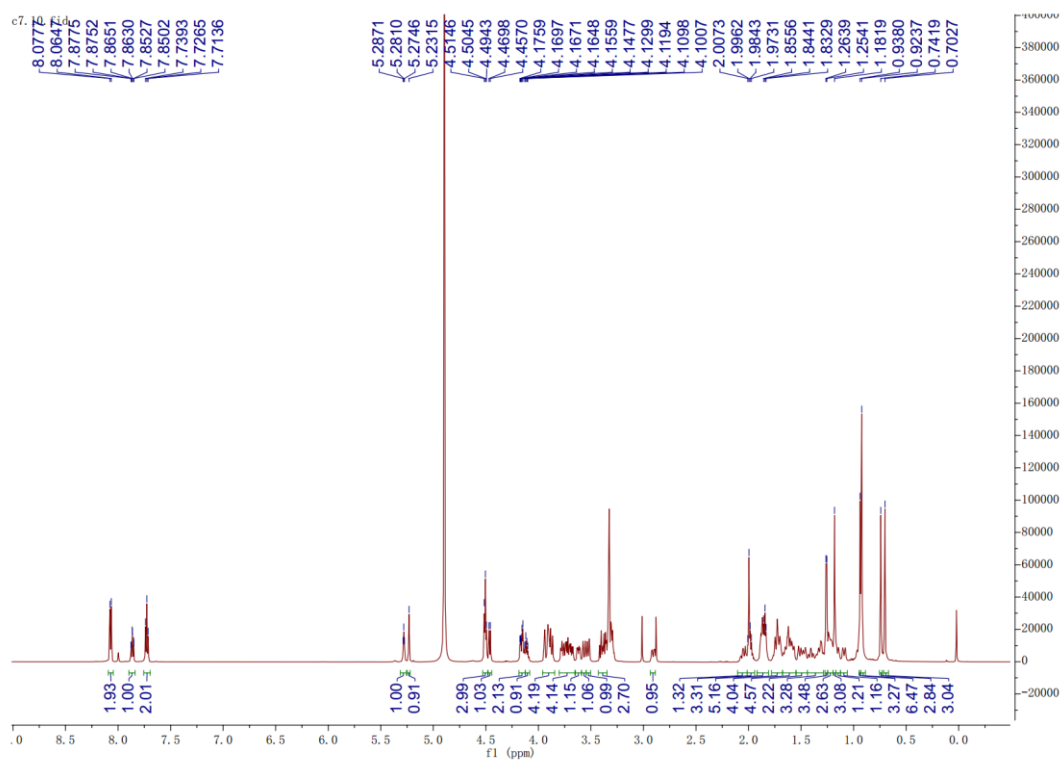

### $^{13}\text{C}$ -NMR of compound **5c**

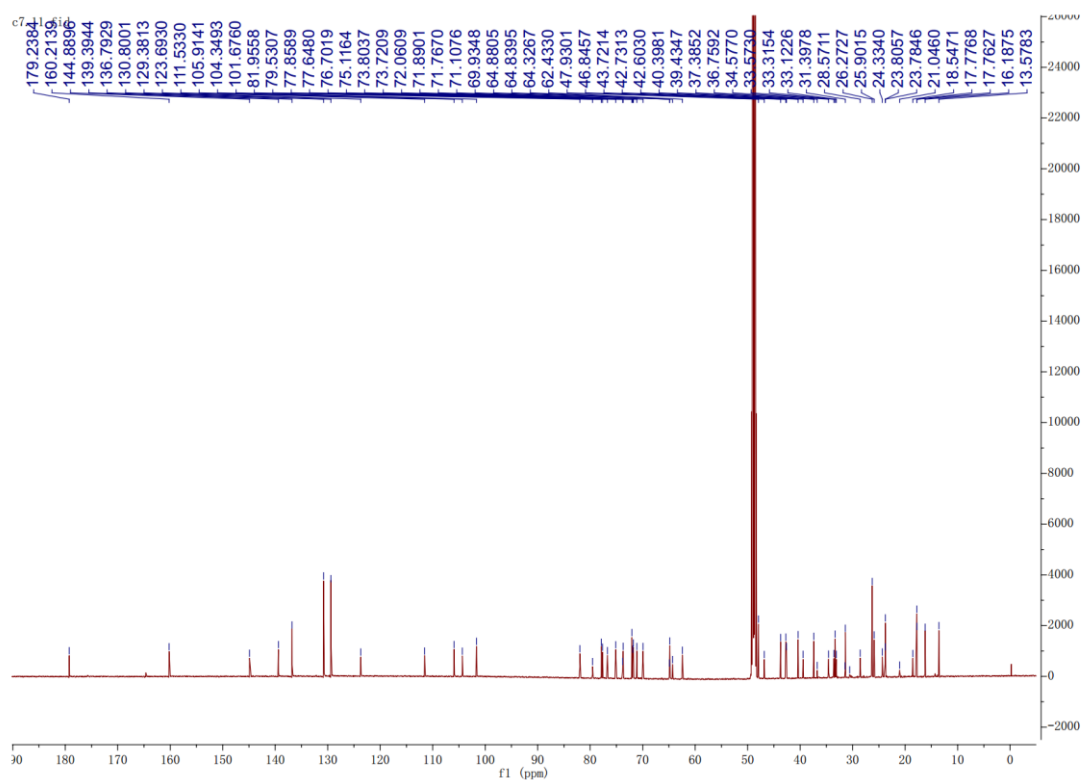

### $^1\text{H}$ -NMR of compound **4d**

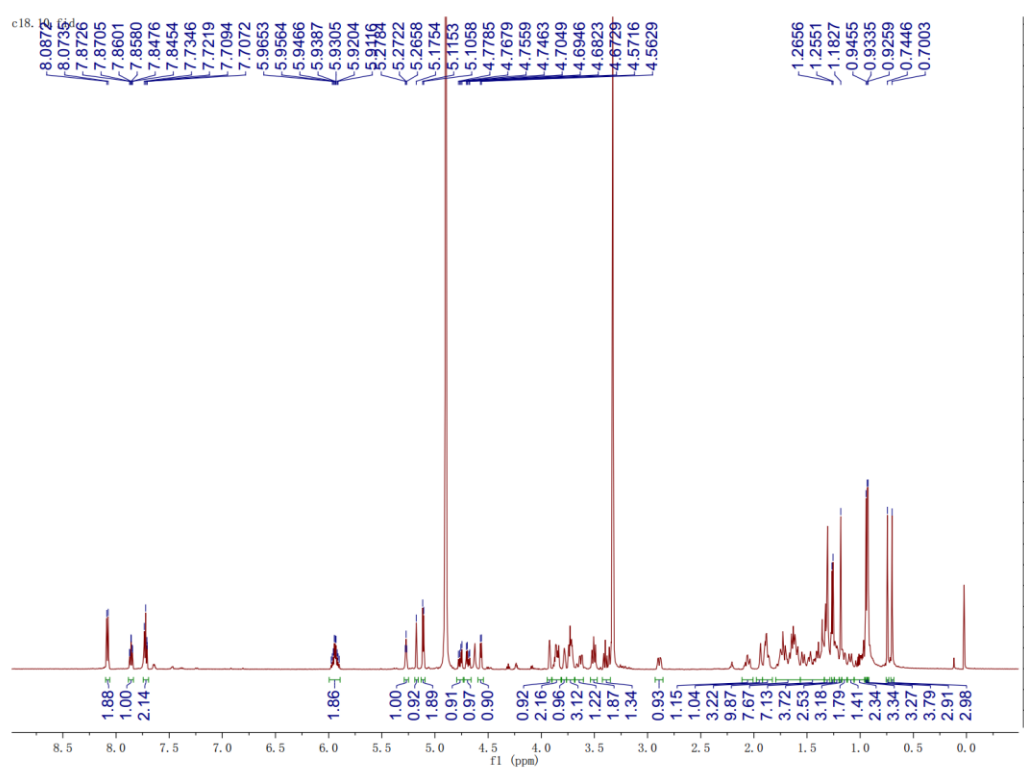

# <sup>1</sup>H-NMR of compound 5d

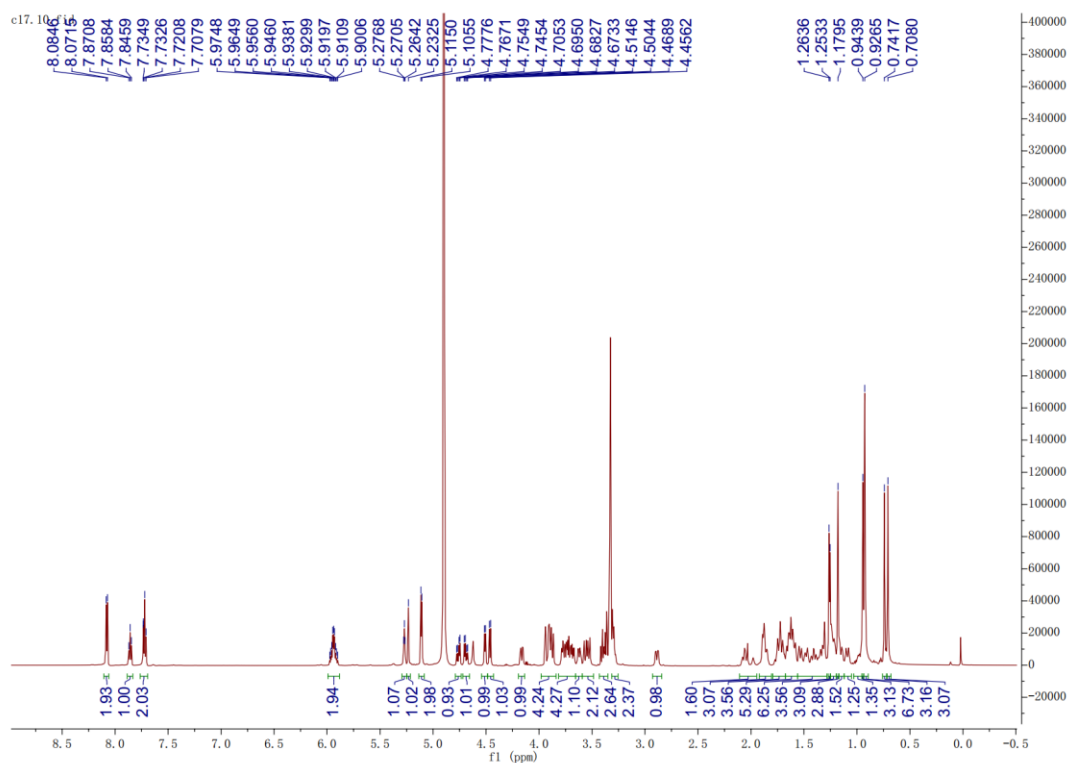

# <sup>13</sup>C-NMR of compound 5d

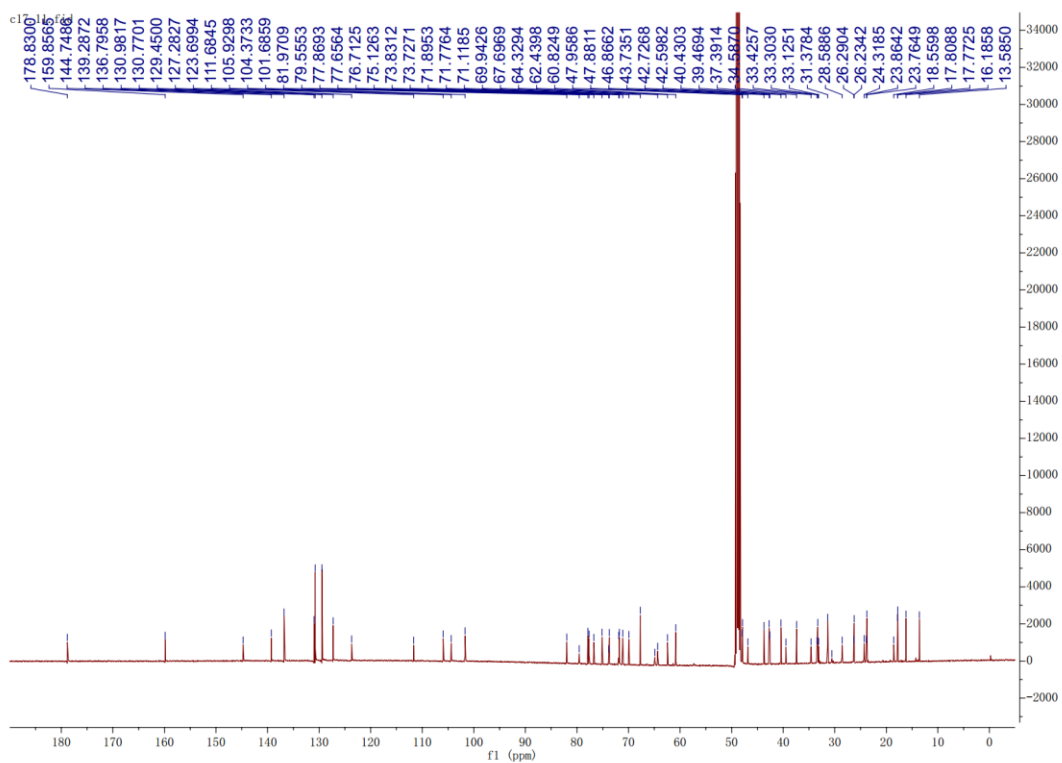



# <sup>1</sup>H-NMR of compound 4e

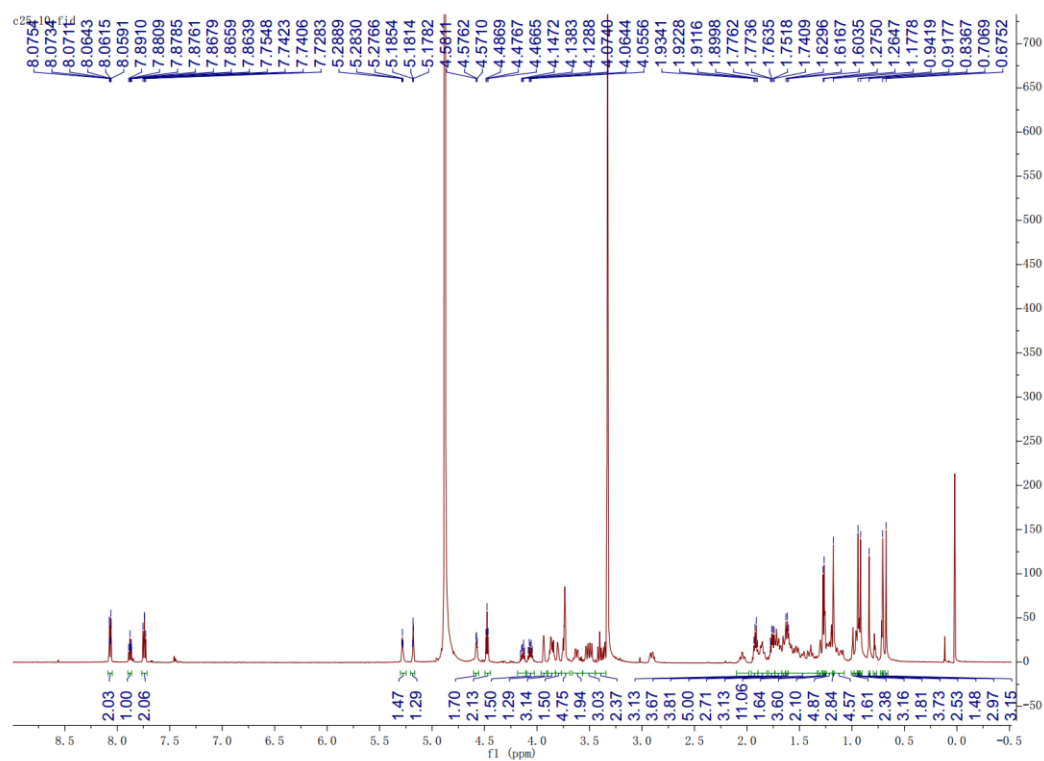

# <sup>13</sup>C-NMR of compound 4e

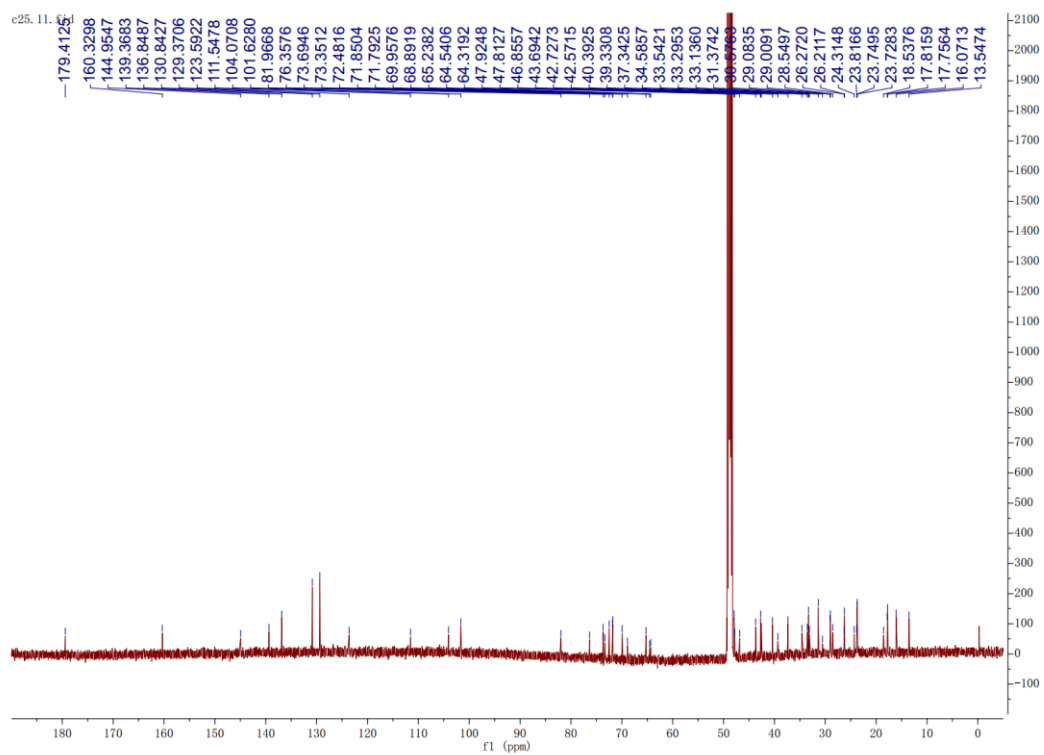

# <sup>1</sup>H-NMR of compound 5e

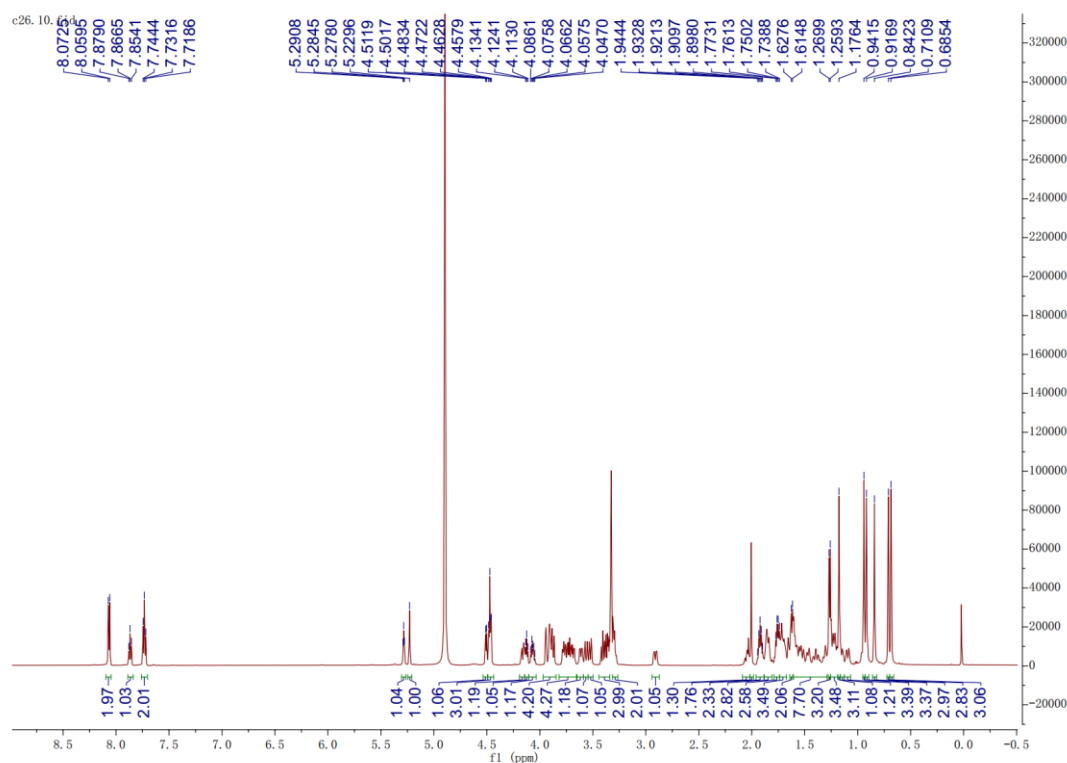

# <sup>13</sup>C-NMR of compound 5e

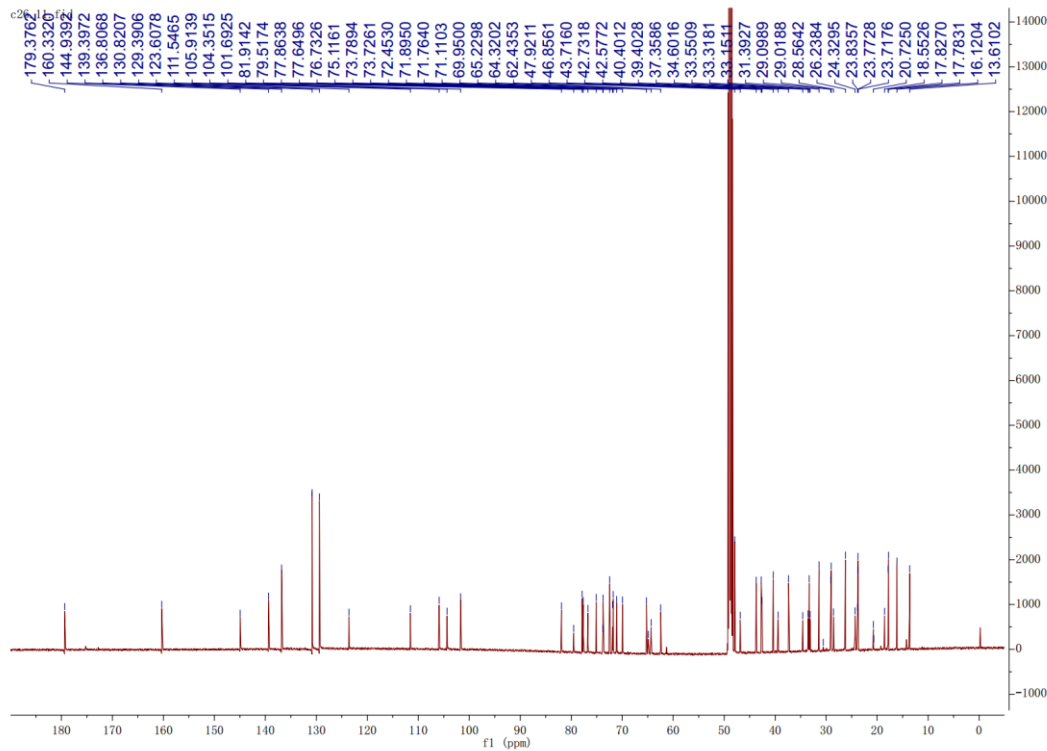

### $^1\text{H-NMR}$ of compound **4f**

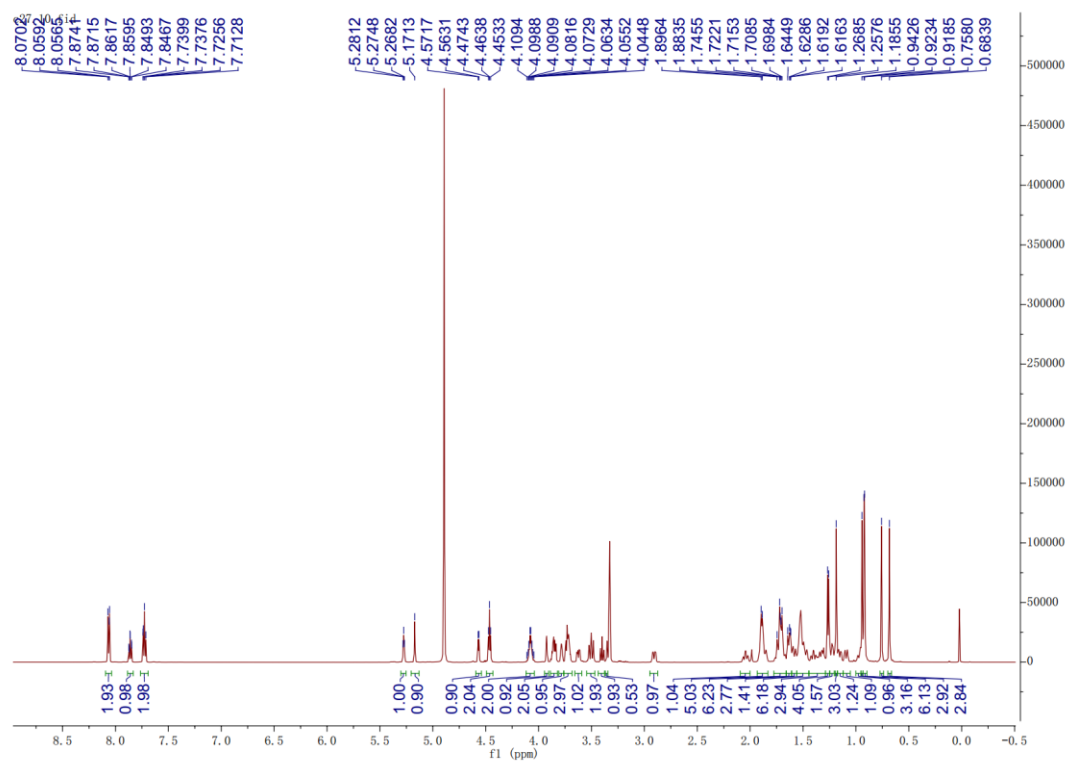

### $^{13}\text{C-NMR}$ of compound **4f**

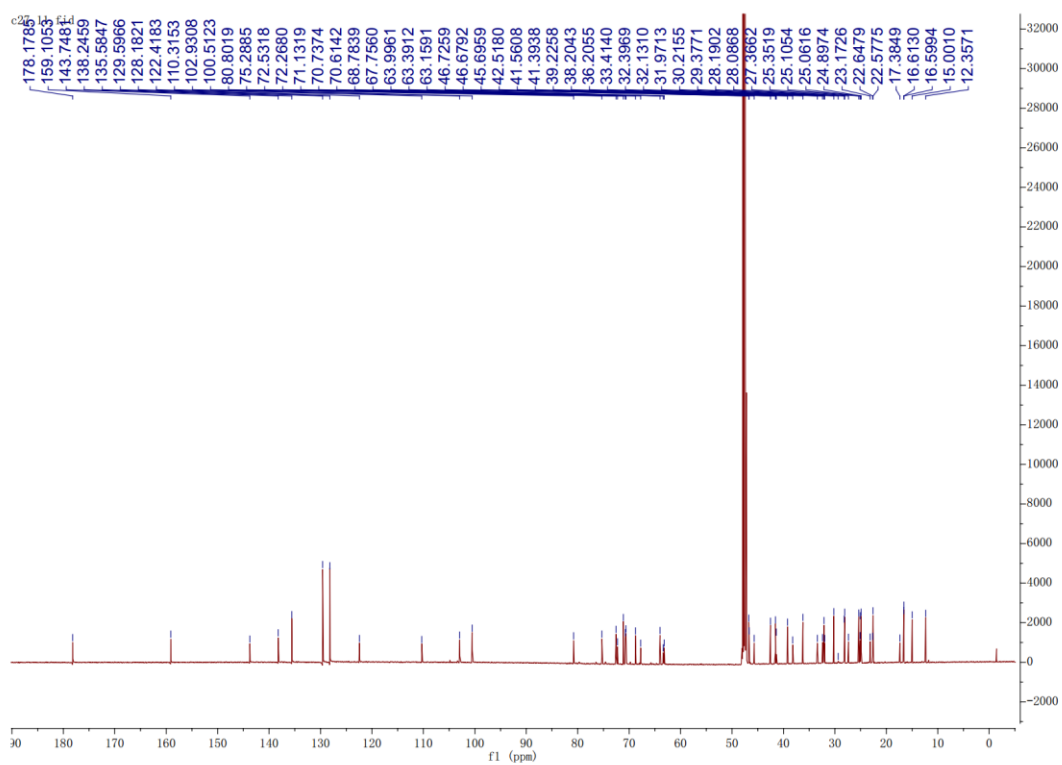

# <sup>1</sup>H-NMR of compound **5f**

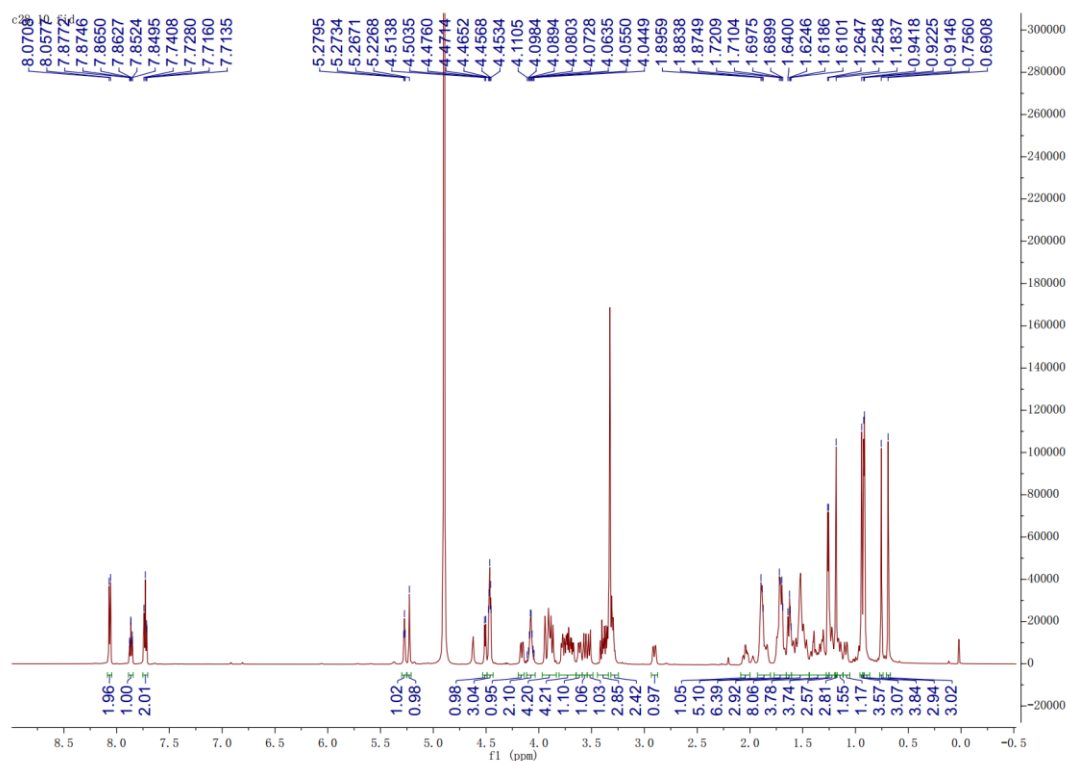

# <sup>13</sup>C-NMR of compound **5f**

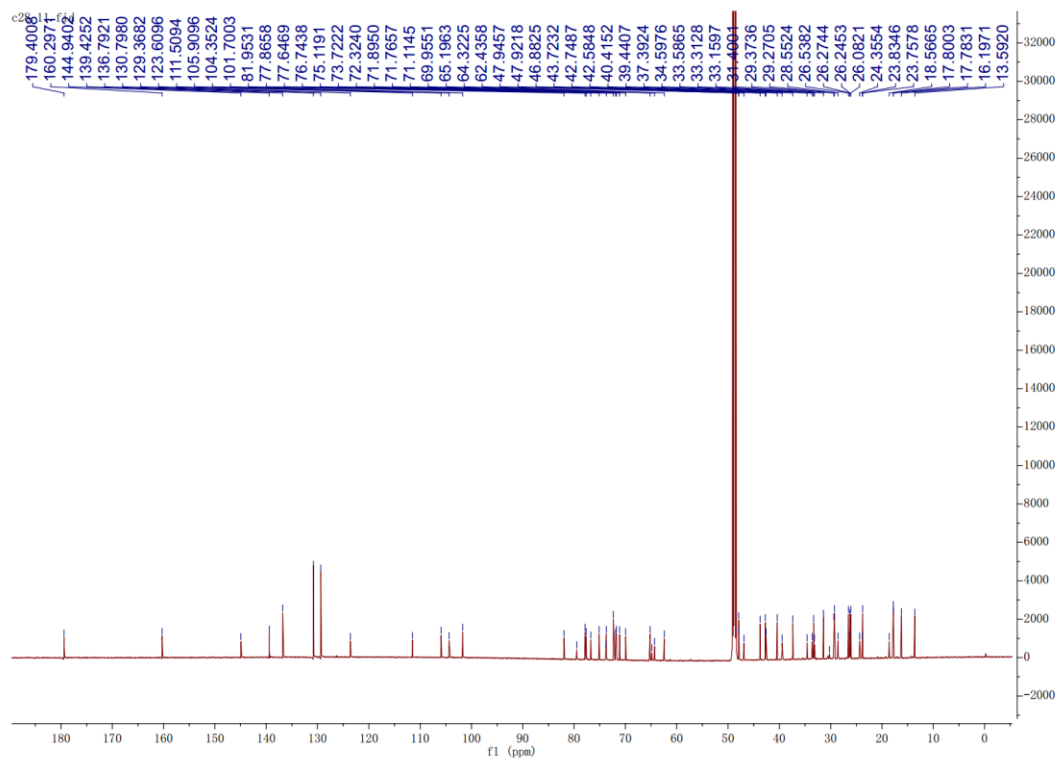

Supplement: d0nj02941f1.pdf [file d0nj02941f1.pdf]
